# Supplementary material for: Human pannexin 1 channel is not phosphorylated by Src tyrosine kinase at Tyr199 and Tyr309
Source: eLife journal article supplement (doi:10.7554/elife.95118), 2024-02-02
Supplement: fig2-data1 [file elife-95118-fig2-data1-v1.zip]

Figure 2-source data 1

Upper panel of Figure 2B

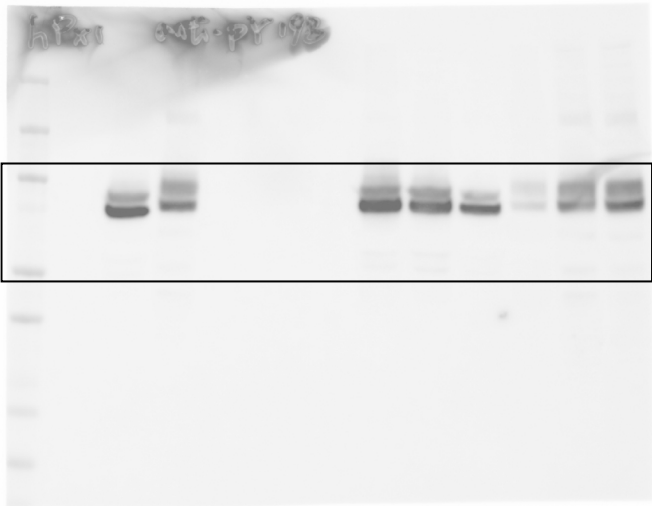

anti-PANX1-pY198

Middle panel of Figure 2B

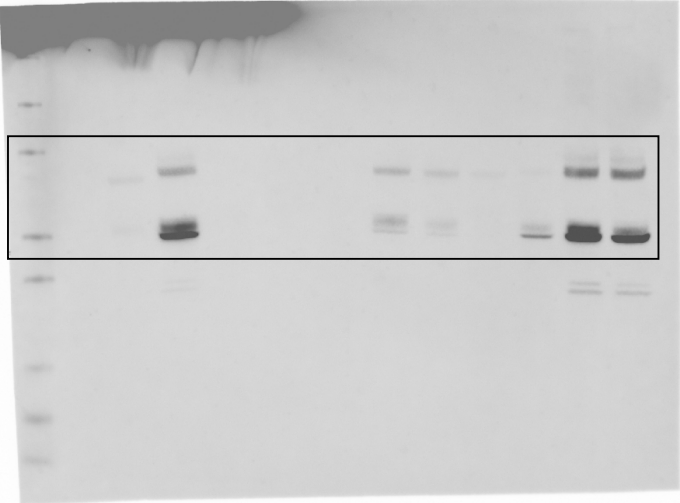

anti-PANX1-pY308

Lower panel of Figure 2B

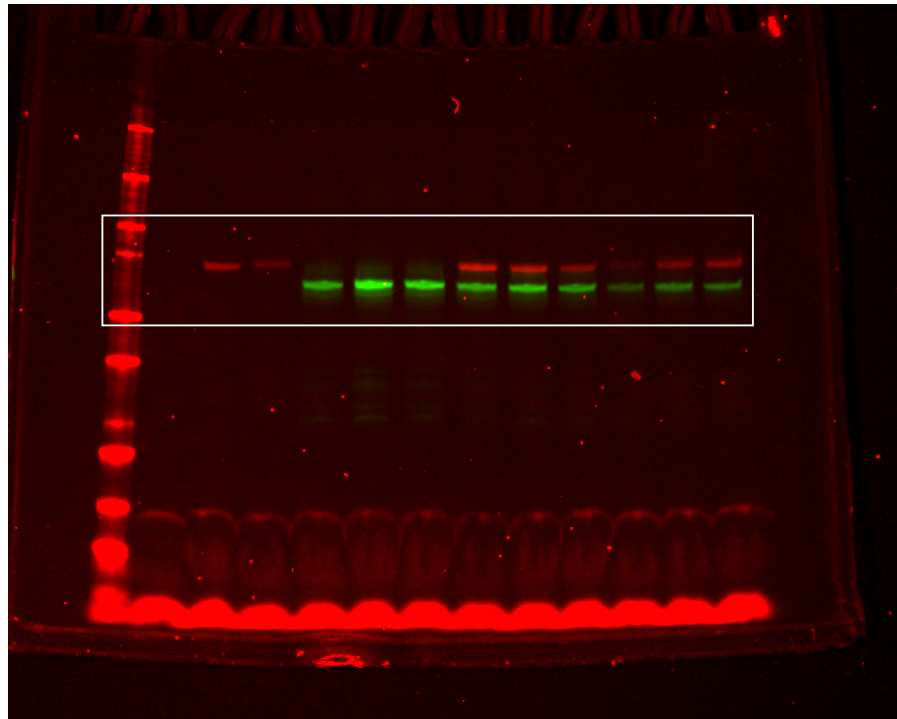

GFP & mCherry fluorescence
