# Supplementary material for: Human pannexin 1 channel is not phosphorylated by Src tyrosine kinase at Tyr199 and Tyr309
Source: eLife journal article supplement (doi:10.7554/elife.95118), 2024-02-02
Supplement: fig3-data1 [file elife-95118-fig3-data1-v1.zip]

Figure 3-source data 1

First panel of Figure 3A

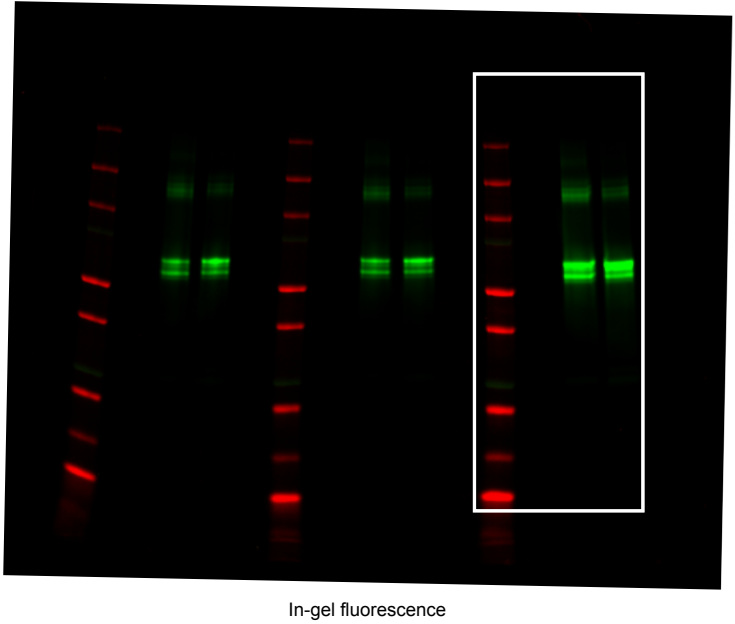

Second panel of Figure 3A

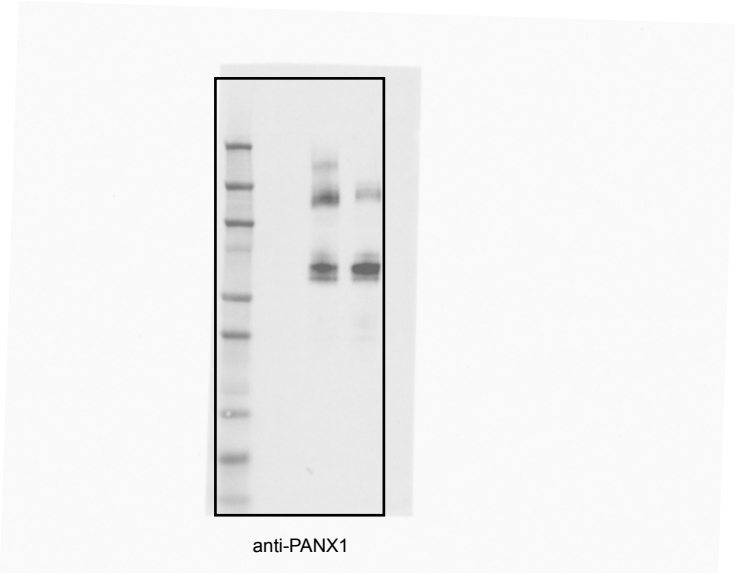

Third panel of Figure 3A

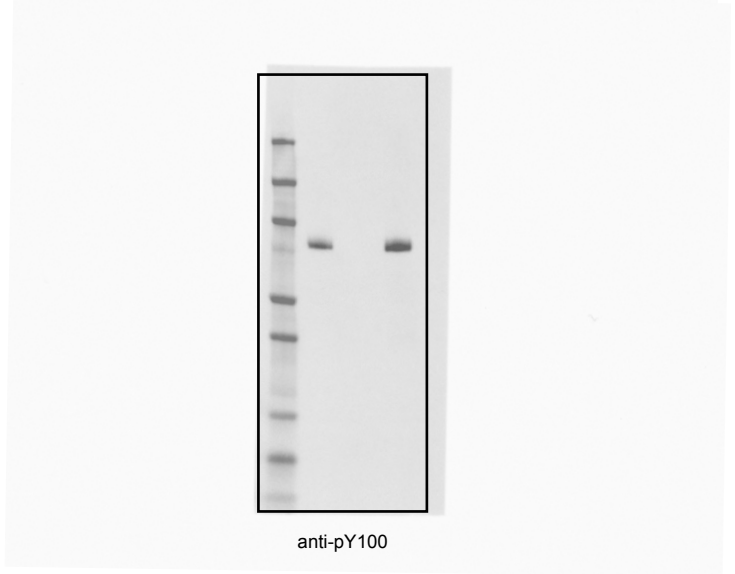

Fourth panel of Figure 3A

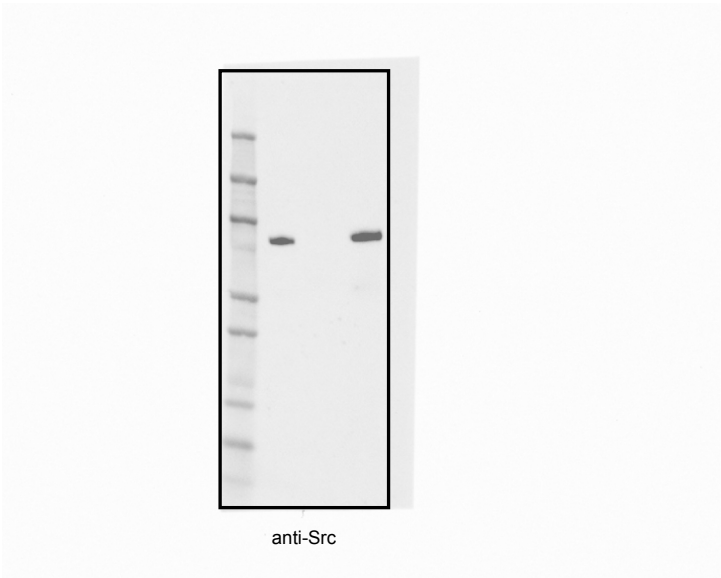

Fifth panel of Figure 3A

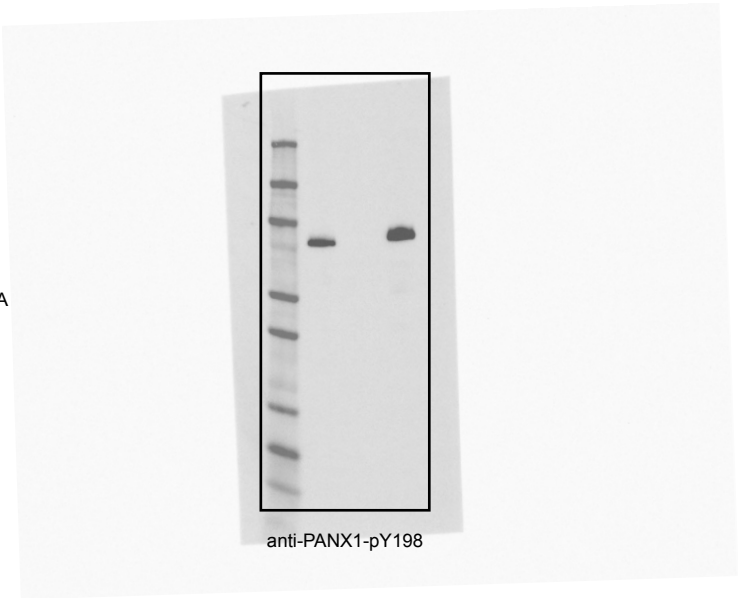

Sixth panel of Figure 3A

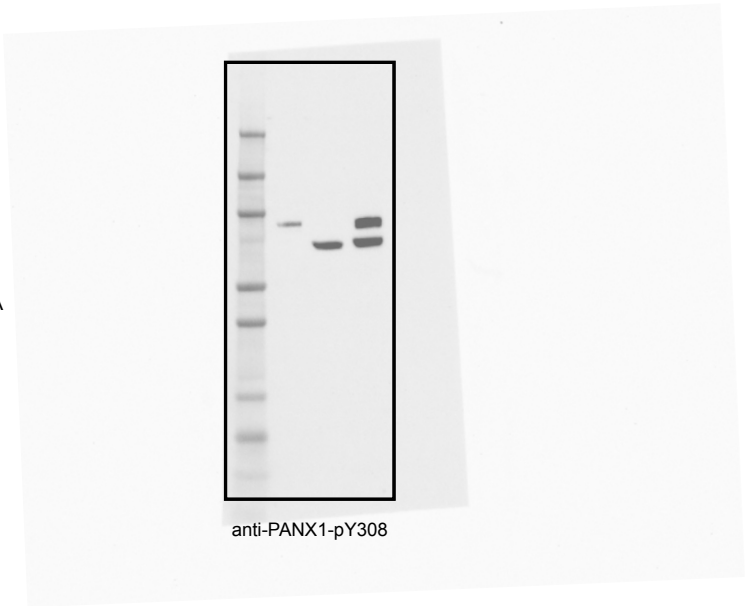

Left panel of Figure 3B

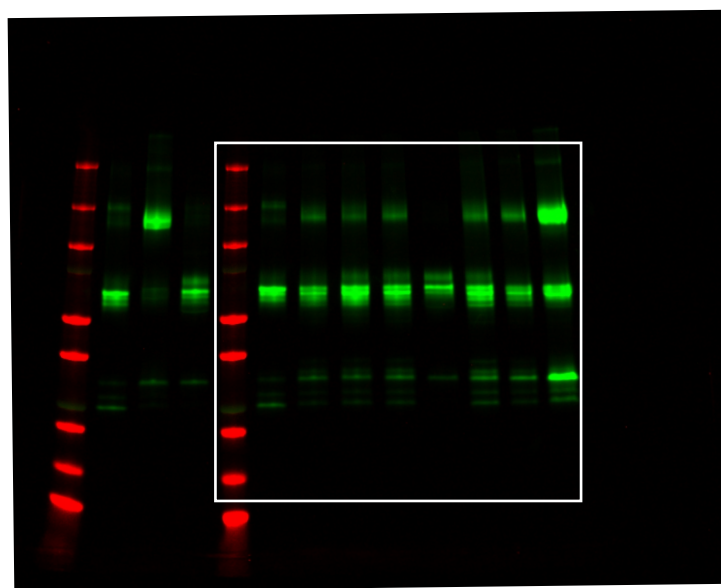

In-gel fluorescence

Right panel of Figure 3B

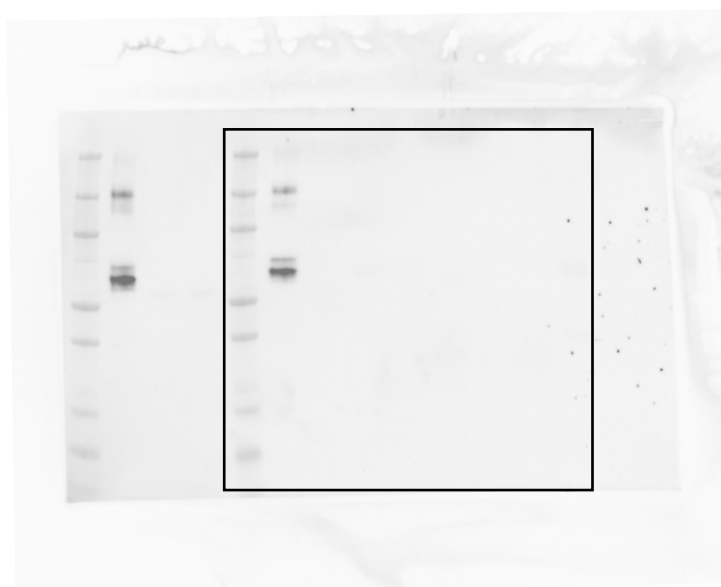

anti-PANX1-pY308

Left panel of Figure 3C

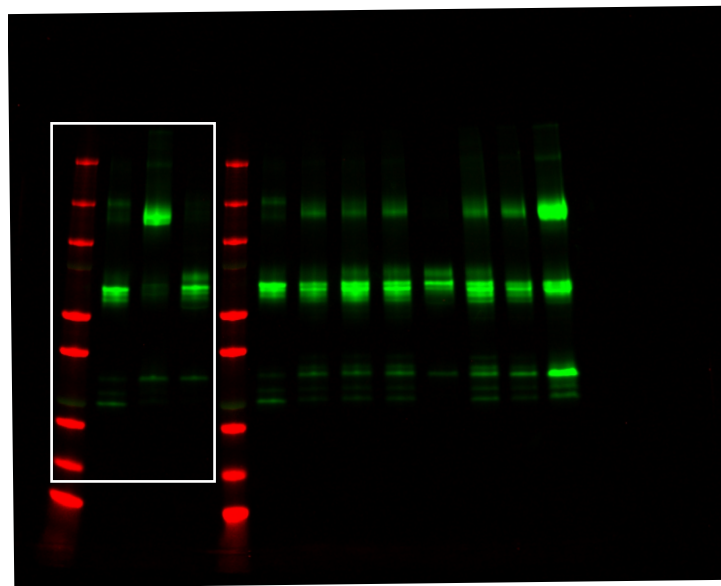

In-gel fluorescence

Right panel of Figure 3C

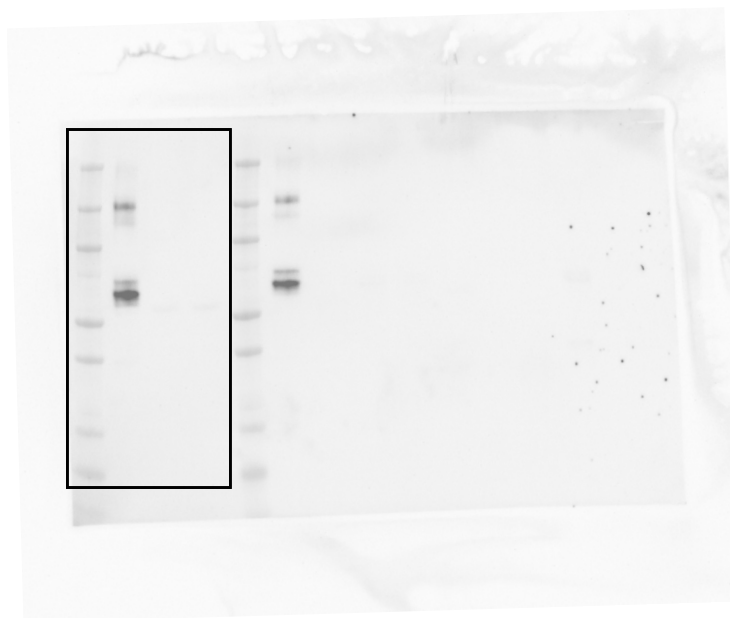

anti-PANX1-pY308

Left panel of Figure 3D

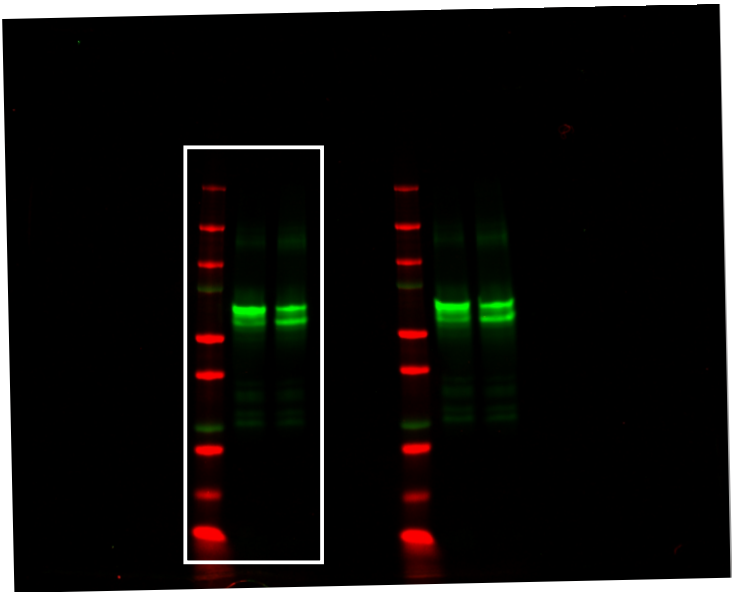

In-gel fluorescence

Middle panel of Figure 3D

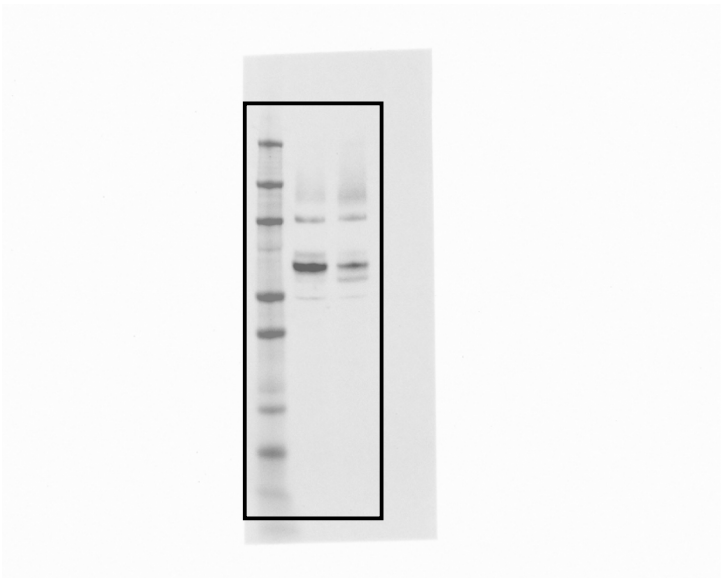

anti-PANX1

Right panel of Figure 3D

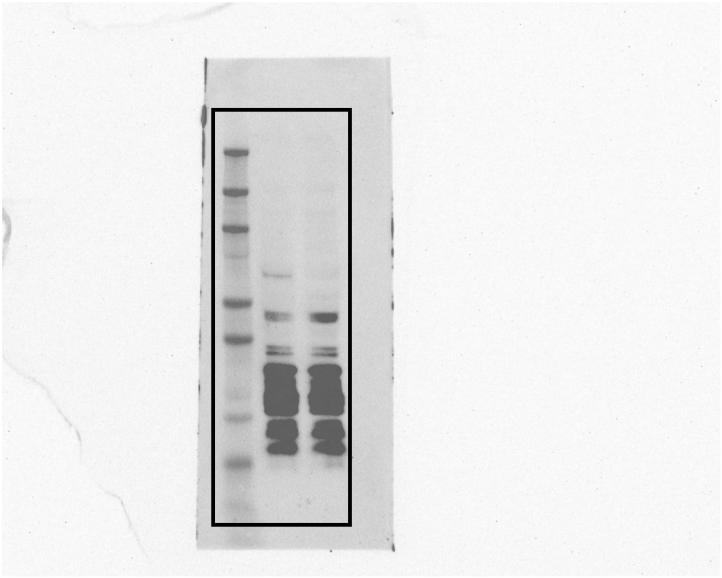

anti-PANX1-pY308
