# Supplementary material for: Human pannexin 1 channel is not phosphorylated by Src tyrosine kinase at Tyr199 and Tyr309
Source: eLife journal article supplement (doi:10.7554/elife.95118), 2024-02-02
Supplement: fig5-data1 [file elife-95118-fig5-data1-v1.zip]

Figure 5-source data 1

Raw gel for Figure 5A

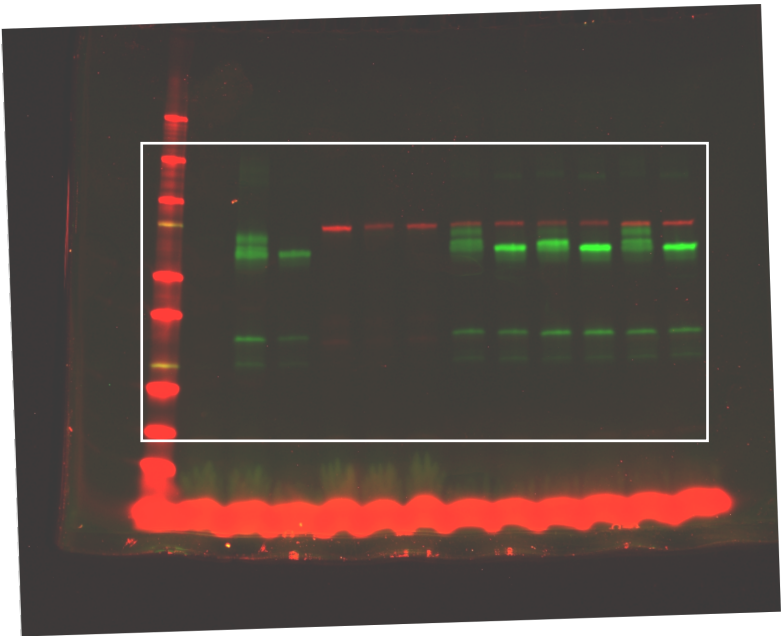

In-gel fluorescence

Raw gel for Figure 5B

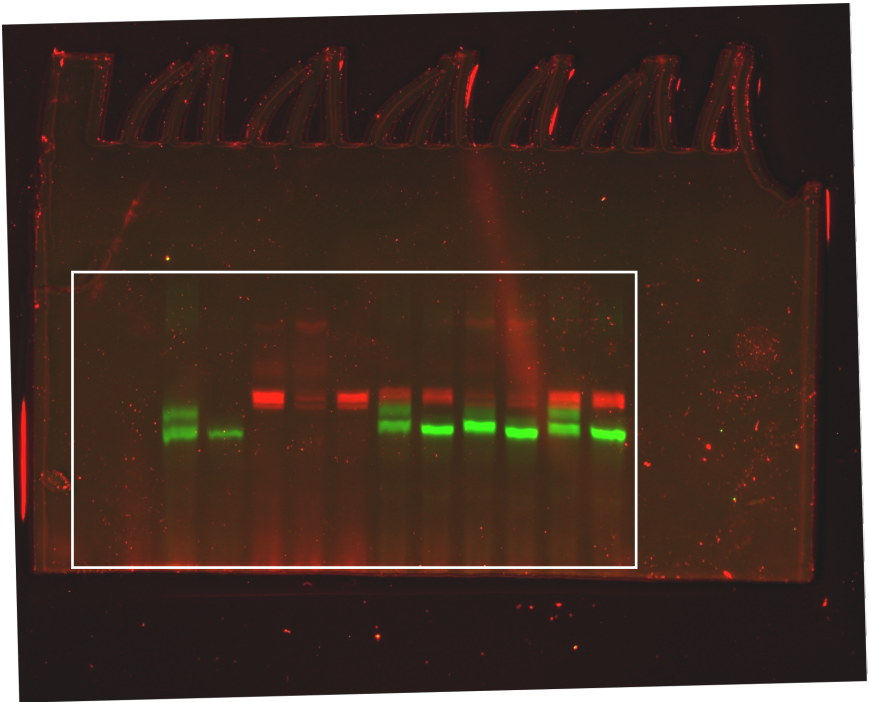

In-gel fluorescence
