# Supplementary material for: Human pannexin 1 channel is not phosphorylated by Src tyrosine kinase at Tyr199 and Tyr309
Source: eLife journal article supplement (doi:10.7554/elife.95118), 2024-02-02
Supplement: fig7-data2 [file Paxnx1_eLife.xlsx]

## Sheet: Sheet1
	Panx1 Group
		Vm (mV)	Cell1	Cell2	Cell3	Cell4	Cell5	Cell6	Cell7
		140	529.645	275.484	1069.06	109.112	154.62	100.794	481.471
		120	435.823	210.284	860.848	110.001	130.113	103.587	397.923
		100	296.858	196.806	732.434	81.6931	102.905	62.6032	284.771
		80	178.913	116.827	521.867	46.5212	83.2057	60.8006	180.6
		60	73.3204	63.8065	340.522	21.4658	57.3641	41.466	94.8536
		40	20.4187	27.9072	195.276	8.04733	36.9875	24.8878	41.1865
		20	3.91421	10.4256	84.5408	3.05815	18.3613	8.70581	12.9395
		0	-0.15059	0.535374	-0.55136	0.137712	0.199527	0.772539	0.908729
		-20	-3.55214	-6.98058	-72.6284	-2.09354	-17.8499	-5.01412	-9.94477
		-40	-11.3775	-13.0776	-136.248	-4.24435	-34.7212	-9.73518	-18.5229
		-60	-20.2578	-17.7325	-203.519	-6.4945	-46.6742	-13.9521	-29.9293
		-80	-28.3574	-21.6439	-253.804	-6.17857	-60.4843	-17.4399	-43.6756
		-100	-36.2471	-25.3124	-293.193	-5.68887	-70.8122	-17.9427	-50.2429
	Panx1+Src Group
		Vm (mV)	Cell1	Cell2	Cell3	Cell4	Cell5	Cell6	Cell7	Cell8	Cell9
		140	118.483	1720.52	116.299	51.6197	196.453	134.949	140.024	258.968	374.551
		120	107.642	1491.87	99.3747	53.0132	189.716	136.33	125.172	189.761	314.563
		100	68.6424	1166.45	82.4504	51.4367	148.64	104.496	97.9484	186.117	263.366
		80	51.1563	854.584	61.9405	41.0333	102.196	90.2778	48.3521	164.112	181.448
		60	34.5835	562.873	30.523	25.4629	64.2164	54.7223	29.4703	111.135	113.383
		40	19.6544	339.456	19.6886	15.9617	40.8304	31.1382	13.18	69.0676	63.5405
		20	8.26859	151.493	8.40802	6.38346	18.5484	11.1407	3.98117	30.8175	27.1534
		0	0.047089	0.049807	0.282058	0.019066	0.0820436	-0.273267	0.0542423	-0.06618	-0.37202
		-20	-6.31172	-127.987	-6.90288	-6.23884	-14.8153	-8.35469	-2.84722	-25.2026	-22.3294
		-40	-12.7781	-236.298	-11.9191	-9.91025	-26.8563	-17.8371	-5.54957	-46.7135	-42.0144
		-60	-18.3582	-329.8	-21.5042	-11.5469	-38.9359	-28.4287	-9.77369	-62.4753	-61.5806
		-80	-20.3789	-418.309	-28.4007	-15.9187	-48.0452	-33.0978	-8.87847	-70.9849	-75.1927
		-100	-26.1236	-485.608	-34.3977	-18.611	-62.8186	-44.7343	-5.77488	-85.0846	-91.1171
